# Supplementary material
Source: PubMed Central journal article supplement (PMC6448059)
Supplement: ajcr0009-0479-f9.pdf [file ajcr0009-0479-f9.pdf]

# Radioresistant NPC cells are prone to metastasis

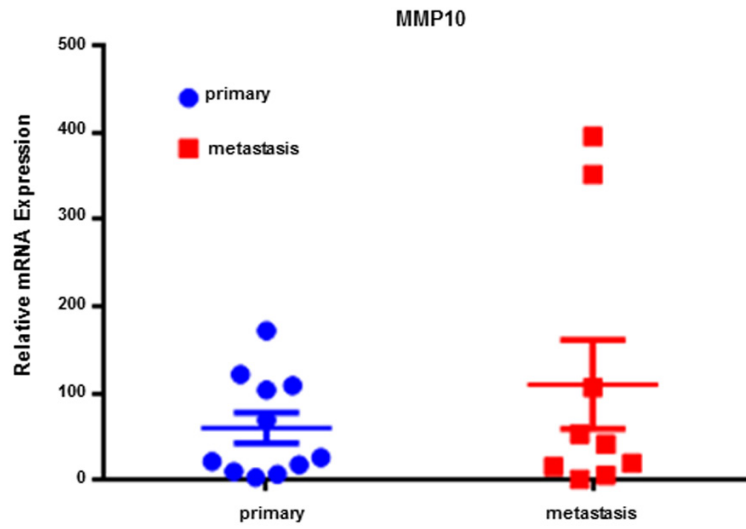

**Supplementary Figure 1.** The MMP10 expression is higher in the metastatic NPC samples than their primary specimens. The expression of MMP10 in corresponding metastatic and primary NPC patient tissues. For primary carcinoma tissue, n = 11. For metastasis tissues, n = 9. P = 0.3302.
